# Supplementary material
Source: Research Square preprint supplement (doi:10.21203/rs.3.rs-9013473/v1)
Supplement: Supplementary file 1 [file addc7c9e08b3e8d714606559.docx]

**Stress Biology**

**Plant growth promotion and biocontrol by novel thermotolerant strains isolated form an active volcano crater**

Martirena-Ramírez A1, Claribel Orquídea Zenteno- Alegría2,3, Yordanis Pérez-Llano4, José Germán Serrano-Gamboa1, Mario León Iza-Arteaga1, Alexis Ricardo Becerril-Cuevas6, Ramón-Batista B2,5*, Folch-Mallol J1*

1Centro de Investigación en Biotecnología, Universidad Autónoma del Estado de Morelos, Cuernavaca 62209, Morelos, México.

2Centro de Investigación en Dinámica Celular, Instituto de Investigación en Ciencias Básicas y Aplicadas. Universidad Autónoma del Estado de Morelos, México.

3Facultad de Ciencias Químicas e Ingeniería, Universidad Autónoma del Estado de Morelos, Cuernavaca 62209, Morelos.

4Centro de Ciencias Genómicas, Universidad Autónoma del Estado de Morelos, Cuernavaca 62209, Morelos.

5Departamento de Biología Animal, Biología Vegetal y Ecología, Facultad de Ciencias Experimentales, Universidad de Jaén, 23071 Jaén, Spain; [amocana@ujaen.es](mailto:amocana@ujaen.es)

6 Laboratorio Nacional de Microscopía Avanzada, Instituto de Biotecnología, Universidad Nacional Autónoma de México, Cuernavaca, Morelos, Mexico

*Correspondence: rabg@uaem.mx or rabg@ujaen.es (R.A.B.-G.); jordi@uaem.mx (J.L.F.-M.)

**Table S1** Culture media used for the morphological characterization of strains of rhizosphere-extreme fungi

| **PDA** | **g/L** |
| --- | --- |
| Papa (infusion) | 200 |
| Dextrose | 20 |
| Agar | 15 |
| **MEA** |  |
| Malt | 20 |
| Glucose | 20 |
| Peptone | 1 |
| Agar | 15 |
| **CYA** |  |
| Saccharose | 30 |
| Yeast extract | 5 |
| K2HP04 | 1 |
| NaNO3 | 0.3 |
| KCl | 0.05 |
| MgSO4 | 0.05 |
| FeSO4 | 0.001 |
| ZnSO4 | 0.001 |
| CuSO4 | 0.0005 |
| Agar | 15 |

**Table S2** List of species and GenBank accession numbers of sequences used in the multi-locus phylogenetic analysis conducted in this study

| **Species** | **Strain** | **GenBank accession numbers** | | |
| --- | --- | --- | --- | --- |
| **ITS** | **β-Tub** | **TEF1-** **α** |
| *Trichoderma asperelloides* | CEN1514 | [OM515026.1](https://www.ncbi.nlm.nih.gov/nucleotide/OM515026.1?report=genbank&log$=nucltop&blast_rank=3&RID=K3S2JFMH014) |  | [ON101428.1](https://www.ncbi.nlm.nih.gov/sites/entrez?cmd=Search&db=nucleotide&term=ON101428.1&dopt=GenBank) |
| *Trichoderma asperelloides* | CEN1533 | [OM515028.1](https://www.ncbi.nlm.nih.gov/nucleotide/OM515028.1?report=genbank&log$=nucltop&blast_rank=4&RID=K3S2JFMH014) |  | [ON101430.1](https://www.ncbi.nlm.nih.gov/sites/entrez?cmd=Search&db=nucleotide&term=ON101430.1&dopt=GenBank) |
| *Trichoderma asperelloides* | CEN277 | [OM515032.1](https://www.ncbi.nlm.nih.gov/nucleotide/OM515032.1?report=genbank&log$=nucltop&blast_rank=1&RID=K3S2JFMH014) |  | [ON101434.1](https://www.ncbi.nlm.nih.gov/sites/entrez?cmd=Search&db=nucleotide&term=ON101434.1&dopt=GenBank) |
| *Trichoderma asperellum* | T1 | [MZ823612.1](https://www.ncbi.nlm.nih.gov/nucleotide/MZ823612.1?report=genbank&log$=nucltop&blast_rank=7&RID=K3S2JFMH014) |  | [LC155108.1](https://www.ncbi.nlm.nih.gov/sites/entrez?cmd=Search&db=nucleotide&term=LC155108.1&dopt=GenBank) |
| *Trichoderma asperellum* | TDM11 | [PP837620.1](https://www.ncbi.nlm.nih.gov/nucleotide/PP837620.1?report=genbank&log$=nucltop&blast_rank=10&RID=K3S2JFMH014) |  | [PP727542.1](https://www.ncbi.nlm.nih.gov/sites/entrez?cmd=Search&db=nucleotide&term=PP727542.1&dopt=GenBank) |
| *Trichoderma atroviride* | 18ASMA013 | [MT520633.1](https://www.ncbi.nlm.nih.gov/nucleotide/MT520633.1?report=genbank&log$=nucltop&blast_rank=1&RID=K42FRAXW014) |  | [MT671874.1](https://www.ncbi.nlm.nih.gov/nucleotide/MT671874.1?report=genbank&log$=nucltop&blast_rank=1&RID=K428T820014) |
| *Trichoderma atroviride* | 18AATH004 | [MT520552.1](https://www.ncbi.nlm.nih.gov/sites/entrez?cmd=Search&db=nucleotide&term=MT520552.1&dopt=GenBank) |  | [MT671919.1](https://www.ncbi.nlm.nih.gov/nucleotide/MT671919.1?report=genbank&log$=nucltop&blast_rank=1&RID=K42VZ7TM016) |
| *Trichoderma anaharzianum* | YMF 1.00241 T | [MH262584](https://www.ncbi.nlm.nih.gov/nuccore/MH262584) |  | [MH236493](https://www.ncbi.nlm.nih.gov/nuccore/MH236493) |
| *Trichoderma hamatum* | DAOM 167057 T | [NR_134371.1](https://www.ncbi.nlm.nih.gov/nucleotide/NR_134371.1?report=genbank&log$=nucltop&blast_rank=3&RID=K3S3VJST016) |  | [AF456911.1](https://www.ncbi.nlm.nih.gov/sites/entrez?cmd=Search&db=nucleotide&term=AF456911.1&dopt=GenBank) |
| *Trichoderma harzianum* | CBS 226.95 T | [AY605713](https://www.ncbi.nlm.nih.gov/nuccore/AY605713) |  | [AF348101](https://www.ncbi.nlm.nih.gov/nuccore/AF348101) |
| *Trichoderma harzianum* | 041BV | [PV139196.1](https://www.ncbi.nlm.nih.gov/sites/entrez?cmd=Search&db=nucleotide&term=PV139196.1&dopt=GenBank) |  | [PV339465.1](https://www.ncbi.nlm.nih.gov/sites/entrez?cmd=Search&db=nucleotide&term=PV339465.1&dopt=GenBank) |
| *Trichoderma koningii* | ATCC 64262 T | [NR_138456.1](https://www.ncbi.nlm.nih.gov/nucleotide/NR_138456.1?report=genbank&log$=nucltop&blast_rank=9&RID=K3S3VJST016) |  | [AY376046.1](https://www.ncbi.nlm.nih.gov/sites/entrez?cmd=Search&db=nucleotide&term=AY376046.1&dopt=GenBank) |
| *Trichoderma koningiopsis* | 005BV | [PV139174.1](https://www.ncbi.nlm.nih.gov/sites/entrez?cmd=Search&db=nucleotide&term=PV139174.1&dopt=GenBank) |  | [PV339463.1](https://www.ncbi.nlm.nih.gov/sites/entrez?cmd=Search&db=nucleotide&term=PV339463.1&dopt=GenBank) |
| *Trichoderma lentinulae* | CGMCC 3.19847 T | [MN594469](https://www.ncbi.nlm.nih.gov/nuccore/MN594469) |  | [MN605878](https://www.ncbi.nlm.nih.gov/nuccore/MN605878) |
| *Trichoderma lieckfeldtiae* | GJS 00-14 | [DQ109528.1](https://www.ncbi.nlm.nih.gov/sites/entrez?cmd=Search&db=nucleotide&term=DQ109528.1&dopt=GenBank) |  | [EU856326.1](https://www.ncbi.nlm.nih.gov/sites/entrez?cmd=Search&db=nucleotide&term=EU856326.1&dopt=GenBank) |
| *Trichoderma pollinicola* | LC11686 T | [MF939593](https://www.ncbi.nlm.nih.gov/nuccore/MF939593) |  | [MF939620](https://www.ncbi.nlm.nih.gov/nuccore/MF939620) |
| *Trichoderma pubescens* | DAOM 166162 T | [NR_077179.1](https://www.ncbi.nlm.nih.gov/nucleotide/NR_077179.1?report=genbank&log$=nucltop&blast_rank=2&RID=K3S3VJST016) |  | [EU279963.1](https://www.ncbi.nlm.nih.gov/sites/entrez?cmd=Search&db=nucleotide&term=EU279963.1&dopt=GenBank) |
| *Trichoderma tlahuicanensis* | BMH-0061 | [OR710780](https://www.ncbi.nlm.nih.gov/nuccore/OR710780.1) |  | [OR711908](https://www.ncbi.nlm.nih.gov/nuccore/OR711908.1) |
| *Trichoderma yunnanense* | CBS 121219 T | [NR_134419.1](https://www.ncbi.nlm.nih.gov/nucleotide/NR_134419.1?report=genbank&log$=nucltop&blast_rank=1&RID=K3S3VJST016) | - | [GU198243.1](https://www.ncbi.nlm.nih.gov/sites/entrez?cmd=Search&db=nucleotide&term=GU198243.1&dopt=GenBank) |
| ***Protocrea pallida*** | **CBS 299.78 T** | [NR_111329](https://www.ncbi.nlm.nih.gov/nuccore/NR_111329.1) |  | [EU703900](https://www.ncbi.nlm.nih.gov/nuccore/EU703900) |
|  |  |  |  |  |
| *Aspergillus dunkleyae* | BRIP 72551a T | [NR_191334.1](https://www.ncbi.nlm.nih.gov/sites/entrez?cmd=Search&db=nucleotide&term=NR_191334.1&dopt=GenBank) | [OR964959.1](https://www.ncbi.nlm.nih.gov/nucleotide/OR964959.1?report=genbank&log$=nucltop&blast_rank=1&RID=K60CHVNU014) | - |
| *Aspergillus felis* | CBS 130245 T | [NR_138341.1](https://www.ncbi.nlm.nih.gov/sites/entrez?cmd=Search&db=nucleotide&term=NR_138341.1&dopt=GenBank) | [MN969363.1](https://www.ncbi.nlm.nih.gov/nucleotide/MN969363.1?report=genbank&log$=nucltop&blast_rank=6&RID=K60CHVNU014) |  |
| *Aspergillus felis* | DTO_327G4 | [KX903292.1](https://www.ncbi.nlm.nih.gov/sites/entrez?cmd=Search&db=nucleotide&term=KX903292.1&dopt=GenBank) | [KX903288.1](https://www.ncbi.nlm.nih.gov/nucleotide/KX903288.1?report=genbank&log$=nucltop&blast_rank=24&RID=K60AXE7F016) | - |
| *Aspergillus frankstonensis* | CBS DTO_341-E7 | [KY808756.1](https://www.ncbi.nlm.nih.gov/sites/entrez?cmd=Search&db=nucleotide&term=KY808756.1&dopt=GenBank) | [KY808594.1](https://www.ncbi.nlm.nih.gov/nucleotide/KY808594.1?report=genbank&log$=nucltop&blast_rank=2&RID=K60CHVNU014) | - |
| *Aspergillus parafelis* | CBS DTO_176-F1 | [KY808742.1](https://www.ncbi.nlm.nih.gov/sites/entrez?cmd=Search&db=nucleotide&term=KY808742.1&dopt=GenBank) | [KY808581.1](https://www.ncbi.nlm.nih.gov/nucleotide/KY808581.1?report=genbank&log$=nucltop&blast_rank=15&RID=K60AXE7F016) |  |
| *Aspergillus parafelis* | CBS DTO_175-H3 | [KY808741.1](https://www.ncbi.nlm.nih.gov/sites/entrez?cmd=Search&db=nucleotide&term=KY808741.1&dopt=GenBank) | [KY808580.1](https://www.ncbi.nlm.nih.gov/nucleotide/KY808580.1?report=genbank&log$=nucltop&blast_rank=16&RID=K60AXE7F016) |  |
| *Aspergillus parafelis* | CBS DTO_341-F2 | [KY808760.1](https://www.ncbi.nlm.nih.gov/sites/entrez?cmd=Search&db=nucleotide&term=KY808760.1&dopt=GenBank) | [KY808598.1](https://www.ncbi.nlm.nih.gov/nucleotide/KY808598.1?report=genbank&log$=nucltop&blast_rank=17&RID=K60AXE7F016) |  |
| *Aspergillus pseudofelis* | CBS DTO_316-C8 | [KY808750.1](https://www.ncbi.nlm.nih.gov/sites/entrez?cmd=Search&db=nucleotide&term=KY808750.1&dopt=GenBank) | [KY808587.1](https://www.ncbi.nlm.nih.gov/nucleotide/KY808587.1?report=genbank&log$=nucltop&blast_rank=12&RID=K60AXE7F016) |  |
| *Aspergillus pseudoviridinutans* | CBS DTO_303-A1 | [KY808745.1](https://www.ncbi.nlm.nih.gov/nucleotide/KY808745.1?report=genbank&log$=nucltop&blast_rank=2&RID=KEFFFVEF016) | [KY808585.1](https://www.ncbi.nlm.nih.gov/sites/entrez?cmd=Search&db=nucleotide&term=KY808585.1&dopt=GenBank) |  |
| *Aspergillus udagawae* | CBS DTO_308-H6 | [KY808746.1](https://www.ncbi.nlm.nih.gov/sites/entrez?cmd=Search&db=nucleotide&term=KY808746.1&dopt=GenBank) | [KY808586.1](https://www.ncbi.nlm.nih.gov/nucleotide/KY808586.1?report=genbank&log$=nucltop&blast_rank=13&RID=K60AXE7F016) |  |
| *Aspergillus udagawae* | CBS DTO_283-D3 | [KY808744.1](https://www.ncbi.nlm.nih.gov/sites/entrez?cmd=Search&db=nucleotide&term=KY808744.1&dopt=GenBank) | [KY808584.1](https://www.ncbi.nlm.nih.gov/nucleotide/KY808584.1?report=genbank&log$=nucltop&blast_rank=14&RID=K60AXE7F016) |  |
| ***Penicillium chrysogenum*** | CBS 306.48 T |  |  |  |
|  |  |  |  |  |
| *Aspergillus brasiliensis* | DSM 1988 |  | [MF281957.1](https://www.ncbi.nlm.nih.gov/sites/entrez?cmd=Search&db=nucleotide&term=MF281957.1&dopt=GenBank) | [MF288897.1](https://www.ncbi.nlm.nih.gov/nucleotide/MF288897.1?report=genbank&log$=nucltop&blast_rank=3&RID=KEGY8ZC5014) |
| *Aspergillus brasiliensis* | CBS 101740 |  | [AY820006.1](https://www.ncbi.nlm.nih.gov/nucleotide/AY820006.1?report=genbank&log$=nucltop&blast_rank=1&RID=KEH1FG56014) | [XM_067619933.1](https://www.ncbi.nlm.nih.gov/nucleotide/XM_067619933.1?report=genbank&log$=nucltop&blast_rank=4&RID=KXPMATFD016) |
| *Aspergillus eucalypticola* | CBS 122712 | - | [KC796360.1](https://www.ncbi.nlm.nih.gov/sites/entrez?cmd=Search&db=nucleotide&term=KC796360.1&dopt=GenBank) | [XM_025532307.1](https://www.ncbi.nlm.nih.gov/nucleotide/XM_025532307.1?report=genbank&log$=nucltop&blast_rank=7&RID=KEGXHSNM014) |
| *Aspergillus luchuensis* | P1 |  | [ON064999.1](https://www.ncbi.nlm.nih.gov/sites/entrez?cmd=Search&db=nucleotide&term=ON064999.1&dopt=GenBank) | [XM_041687714.1](https://www.ncbi.nlm.nih.gov/nucleotide/XM_041687714.1?report=genbank&log$=nucltop&blast_rank=2&RID=KGKNZR32016) |
| *Aspergillus neoniger* | CBS 115656 |  | [KC796361.1](https://www.ncbi.nlm.nih.gov/nucleotide/KC796361.1?report=genbank&log$=nucltop&blast_rank=10&RID=KEH1FG56014) | [XM_025622602.1](https://www.ncbi.nlm.nih.gov/nucleotide/XM_025622602.1?report=genbank&log$=nucltop&blast_rank=1&RID=KVM4FCYC014) |
| *Aspergillus niger* | ITEM 7496 | - | [FN394677.1](https://www.ncbi.nlm.nih.gov/sites/entrez?cmd=Search&db=nucleotide&term=FN394677.1&dopt=GenBank) | [FN665657.1](https://www.ncbi.nlm.nih.gov/nucleotide/FN665657.1?report=genbank&log$=nucltop&blast_rank=7&RID=KVGNEN3T014) |
| *Aspergillus piperis* | A5 |  | [KJ469441.1](https://www.ncbi.nlm.nih.gov/sites/entrez?cmd=Search&db=nucleotide&term=KJ469441.1&dopt=GenBank) | [XM_025660682.1](https://www.ncbi.nlm.nih.gov/nucleotide/XM_025660682.1?report=genbank&log$=nucltop&blast_rank=1&RID=KVFECRM9014) |
| *Aspergillus pulverulentus* | CBS 558.65 |  | [HE984408.1](https://www.ncbi.nlm.nih.gov/nucleotide/HE984408.1?report=genbank&log$=nucltop&blast_rank=4&RID=KEH1FG56014) | [HE984395.1](https://www.ncbi.nlm.nih.gov/sites/entrez?cmd=Search&db=nucleotide&term=HE984395.1&dopt=GenBank) |
| *Aspergillus tubingensis* | GASPT-3 | - | [PP941123.1](https://www.ncbi.nlm.nih.gov/sites/entrez?cmd=Search&db=nucleotide&term=PP941123.1&dopt=GenBank) | [PP941121.1](https://www.ncbi.nlm.nih.gov/sites/entrez?cmd=Search&db=nucleotide&term=PP941121.1&dopt=GenBank) |
| *Aspergillus vadensis* | CBS 113365 |  | [AY585531.1](https://www.ncbi.nlm.nih.gov/nucleotide/AY585531.1?report=genbank&log$=nucltop&blast_rank=10&RID=KVGWFGZM014) | [XM_025702074.1](https://www.ncbi.nlm.nih.gov/nucleotide/XM_025702074.1?report=genbank&log$=nucltop&blast_rank=6&RID=KGMU76P6014) |
| *Aspergillus welwitschiae* | CBS 139.54 |  | [MN969369.1](https://www.ncbi.nlm.nih.gov/nucleotide/MN969369.1?report=genbank&log$=nucltop&blast_rank=7&RID=KVGWFGZM014) | [XM_026766727.1](https://www.ncbi.nlm.nih.gov/nucleotide/XM_026766727.1?report=genbank&log$=nucltop&blast_rank=15&RID=KYZE96J9016) |
| ***Penicillium chrysogenum*** | CBS 306.48 T | [NR_077145.1](https://www.ncbi.nlm.nih.gov/sites/entrez?cmd=Search&db=nucleotide&term=NR_077145.1&dopt=GenBank) | [JF909955.1](https://www.ncbi.nlm.nih.gov/sites/entrez?cmd=Search&db=nucleotide&term=JF909955.1&dopt=GenBank) | [XM_056711856.1](https://www.ncbi.nlm.nih.gov/sites/entrez?cmd=Search&db=nucleotide&term=XM_056711856.1&dopt=GenBank) |
|  |  |  |  |  |
| *Penicillium corylophilum* | CBS 129789 | [MH865544.1](https://www.ncbi.nlm.nih.gov/sites/entrez?cmd=Search&db=nucleotide&term=MH865544.1&dopt=GenBank) | [PV057850.1](https://www.ncbi.nlm.nih.gov/sites/entrez?cmd=Search&db=nucleotide&term=PV057850.1&dopt=GenBank) | - |
| *Penicillium diabolicalicense* | KAS 1726 T | [KT887840.1](https://www.ncbi.nlm.nih.gov/nucleotide/KT887840.1?report=genbank&log$=nucltop&blast_rank=2&RID=KVTHMF3M014) | [KT887801.1](https://www.ncbi.nlm.nih.gov/nucleotide/KT887801.1?report=genbank&log$=nucltop&blast_rank=17&RID=KVRZTUE5014) | - |
| *Penicillium fagi* | CBS 689.77 | [NR_163678.1](https://www.ncbi.nlm.nih.gov/nucleotide/NR_163678.1?report=genbank&log$=nucltop&blast_rank=18&RID=KVTHMF3M014) | [KJ834449.1](https://www.ncbi.nlm.nih.gov/sites/entrez?cmd=Search&db=nucleotide&term=KJ834449.1&dopt=GenBank) |  |
| *Penicillium maclennaniae* | CBS 197.81 | [MH861327.1](https://www.ncbi.nlm.nih.gov/nucleotide/MH861327.1?report=genbank&log$=nucltop&blast_rank=3&RID=KVS22JVC014) | [PV058264.1](https://www.ncbi.nlm.nih.gov/nucleotide/PV058264.1?report=genbank&log$=nucltop&blast_rank=10&RID=KVRZTUE5014) |  |
| *Penicillium maclennaniae* | CBS 198.81 T | [MH861328.1](https://www.ncbi.nlm.nih.gov/nucleotide/MH861328.1?report=genbank&log$=nucltop&blast_rank=10&RID=KVTHMF3M014) | [KJ834468.1](https://www.ncbi.nlm.nih.gov/nucleotide/KJ834468.1?report=genbank&log$=nucltop&blast_rank=11&RID=KVRZTUE5014) |  |
| *Penicillium melinii* | E-13 | [PQ460571.1](https://www.ncbi.nlm.nih.gov/sites/entrez?cmd=Search&db=nucleotide&term=PQ460571.1&dopt=GenBank) | [PQ468957.1](https://www.ncbi.nlm.nih.gov/sites/entrez?cmd=Search&db=nucleotide&term=PQ468957.1&dopt=GenBank) | - |
| *Penicillium raciborskii* | NRRL 2150 T | [NR_121234.1](https://www.ncbi.nlm.nih.gov/nucleotide/NR_121234.1?report=genbank&log$=nucltop&blast_rank=15&RID=KVTHMF3M014) | [JX141069.1](https://www.ncbi.nlm.nih.gov/nucleotide/JX141069.1?report=genbank&log$=nucltop&blast_rank=1&RID=KXKDNAR3014) |  |
| *Penicillium smithii* | CBS:276.83 T | [MH861587.1](https://www.ncbi.nlm.nih.gov/nucleotide/MH861587.1?report=genbank&log$=nucltop&blast_rank=14&RID=KVTHMF3M014) | [KJ834492.1](https://www.ncbi.nlm.nih.gov/nucleotide/KJ834492.1?report=genbank&log$=nucltop&blast_rank=49&RID=KVRZTUE5014) |  |
| *Penicillium terrenum* | CBS:313.67 T | [NR_163675.1](https://www.ncbi.nlm.nih.gov/nucleotide/NR_163675.1?report=genbank&log$=nucltop&blast_rank=4&RID=KVTHMF3M014) | [KJ834496.1](https://www.ncbi.nlm.nih.gov/sites/entrez?cmd=Search&db=nucleotide&term=KJ834496.1&dopt=GenBank) | - |
| *Penicillium velutinum* | NRRL 2069 T | [NR_121235.1](https://www.ncbi.nlm.nih.gov/nucleotide/NR_121235.1?report=genbank&log$=nucltop&blast_rank=13&RID=KVTHMF3M014) | [JX141170.1](https://www.ncbi.nlm.nih.gov/nucleotide/JX141170.1?report=genbank&log$=nucltop&blast_rank=3&RID=KVRZTUE5014) |  |
| *Penicillium velutinum* | KMM 5002 | [PP217404.1](https://www.ncbi.nlm.nih.gov/nucleotide/PP217404.1?report=genbank&log$=nucltop&blast_rank=4&RID=KVS22JVC014) | [PV916746.1](https://www.ncbi.nlm.nih.gov/nucleotide/PV916746.1?report=genbank&log$=nucltop&blast_rank=4&RID=KVRZTUE5014) |  |
| ***Talaromyces marneffei*** | CBS 388.87 T | [NR_103671.2](https://www.ncbi.nlm.nih.gov/sites/entrez?cmd=Search&db=nucleotide&term=NR_103671.2&dopt=GenBank) | [JX091389.1](https://www.ncbi.nlm.nih.gov/sites/entrez?cmd=Search&db=nucleotide&term=JX091389.1&dopt=GenBank) |  |
| **ITS**: internal transcribed spacer regions; **B-Tub**: beta-tubulin gen; **TEF1-** **α:** translation elongation factor-1α; outgroup data are indicated in bold. T from TYPE material. | | | | |


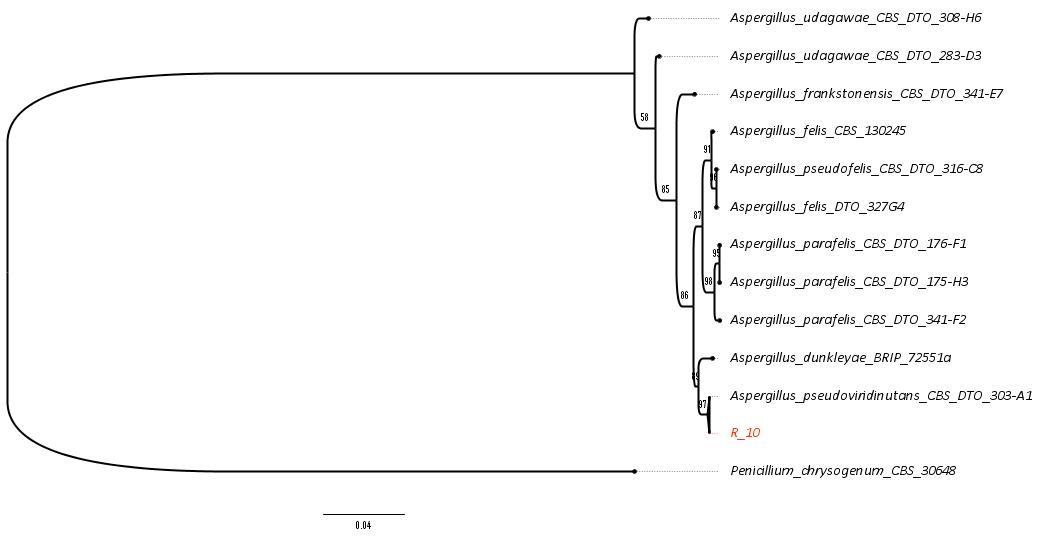


**Fig. S1** Phylogenetic tree generated by multilocus phylogeny of R_10. The tree was inferred from concatenated nucleotide sequences of the ITS and β-tubulin markers. Outgroup: *Penicillium chrysogenum*


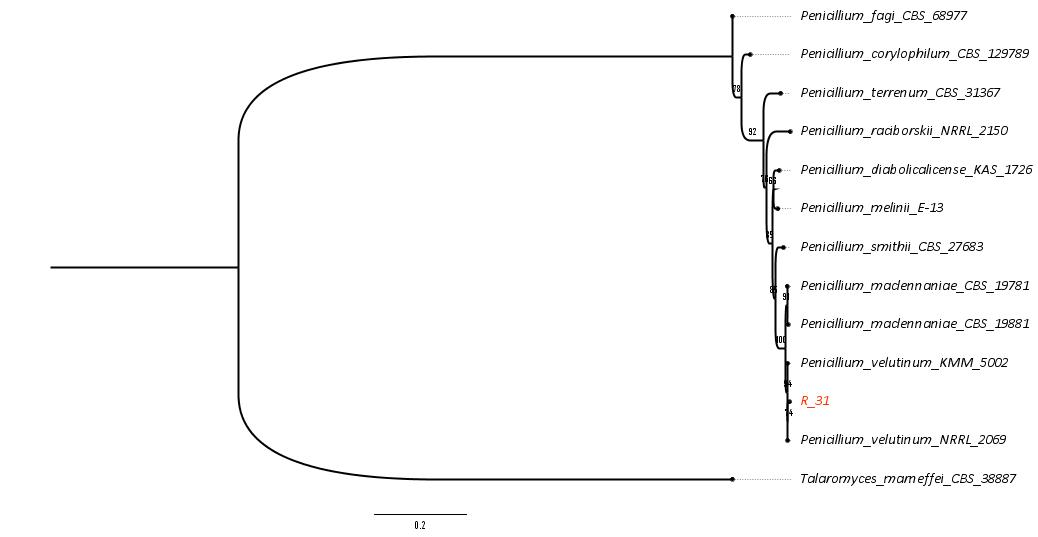


**Fig. S2** Phylogenetic tree generated by multilocus phylogeny of R_31. The tree was inferred from concatenated nucleotide sequences of the ITS and β-tubulin markers. Outgroup: *Talaromyces mameffei*


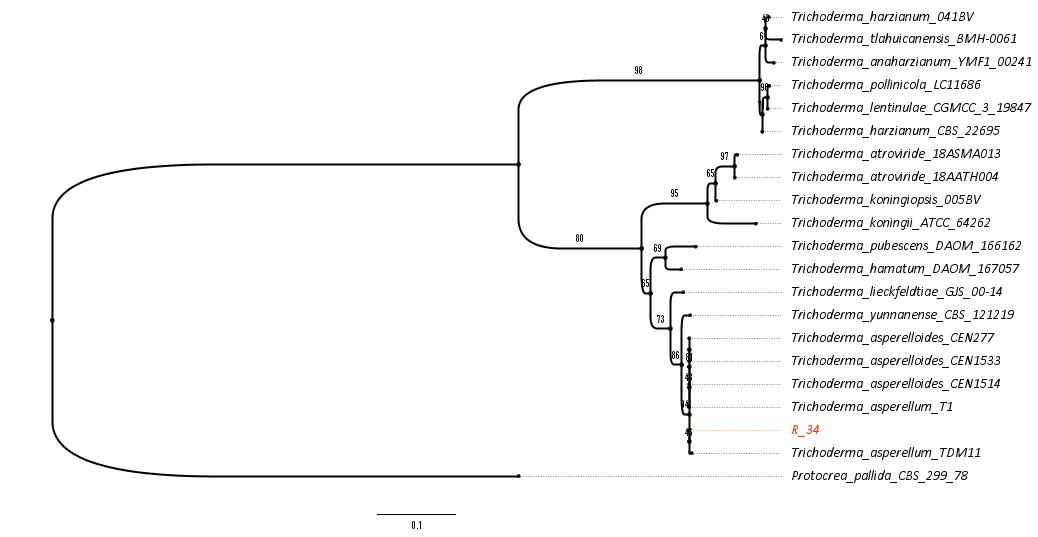


**Fig. S3** Phylogenetic tree generated by multilocus phylogeny of R_34. The tree was inferred from concatenated nucleotide sequences of the ITS and EF1 markers. Outgroup: *Protocrea pallida*


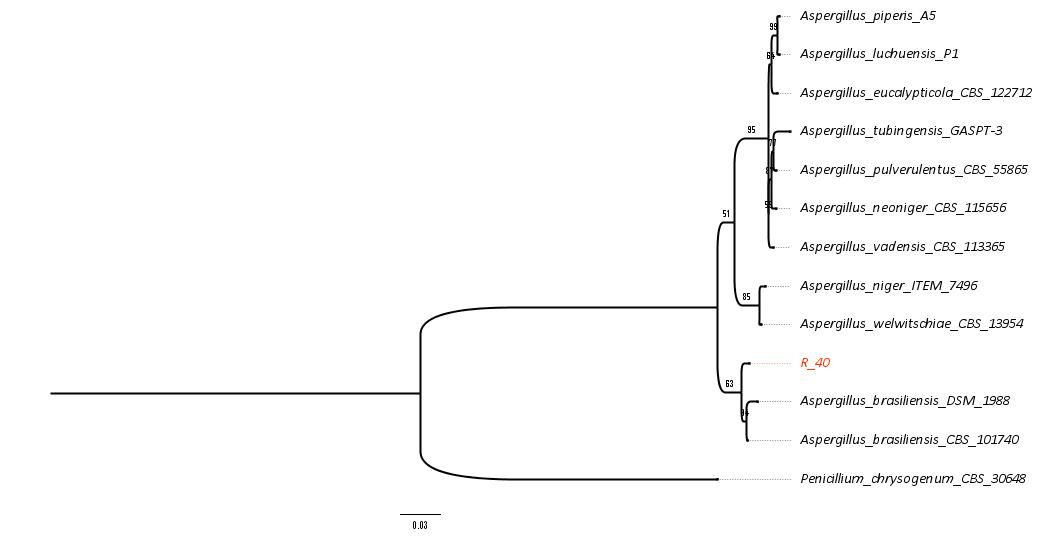


**Fig. S4** Phylogenetic tree generated by multilocus phylogeny of R_40. The tree was inferred from concatenated nucleotide sequences of the EF1 and β-tubulin markers. Outgroup: *Penicillium chrysogenum*


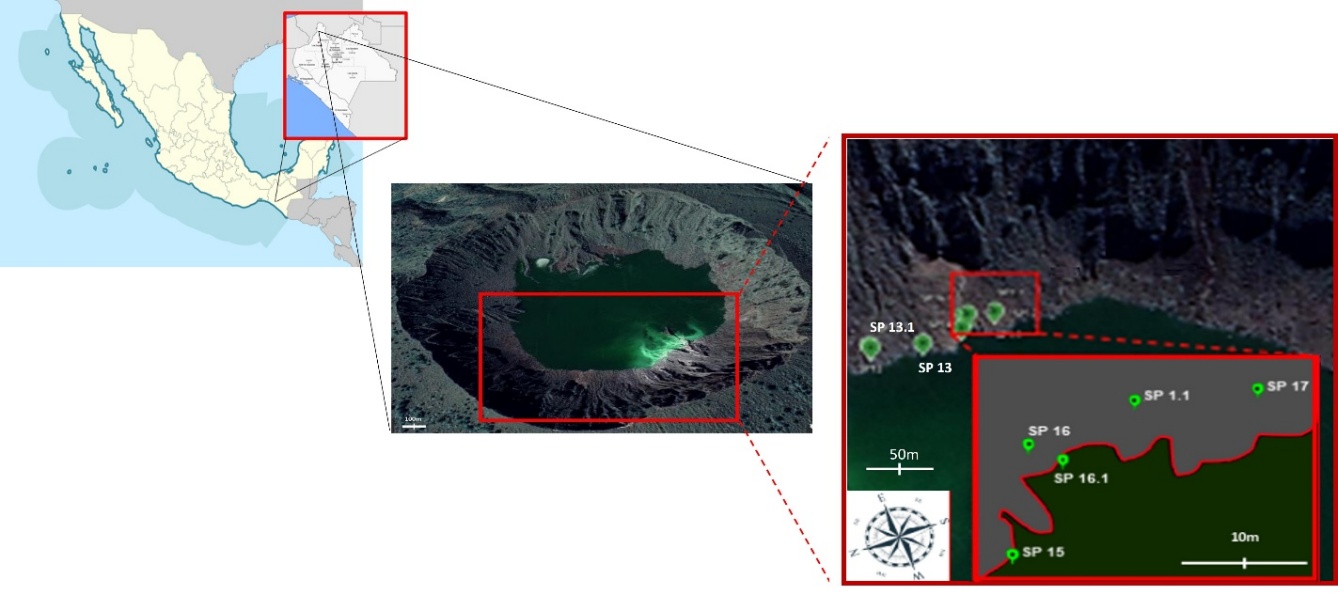


**Fig. S5** Satellite image of the Chichonal volcano crater obtained from Google Earth, along with higher-resolution graphics indicating the sample collection sites
